# Supplementary material for: ROS1 5-methylcytosine DNA glycosylase is a slow-turnover catalyst that initiates DNA demethylation in a distributive fashion
Source: PubMed Central journal article supplement — Nucleic Acids Res. 2009 May 13;37(13):4264–74. doi: 10.1093/nar/gkp390 (PMC2715244; doi:10.1093/nar/gkp390), 2009-05-13
Supplement: gkp390_1.pdf [file gkp390_1.pdf]

### SUPPLEMENTARY FIGURE 1

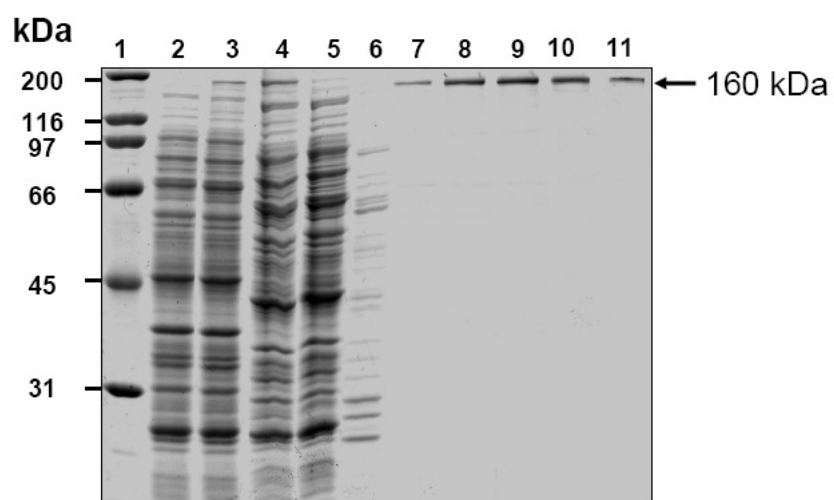

**Supplementary Figure 1. Expression and purification of His-tagged ROS1 protein.** Protein samples obtained during the purification process (see Materials and Methods) were analyzed by SDS-10% PAGE and Coomassie Blue staining. Protein markers (lane 1); cleared lysate before (lane 2) and after IPTG induction (lane 3); soluble material loaded onto the Ni<sup>2+</sup>-sepharose column (lane 4); column flow through (lane 5); column wash with 100 mM imidazole SB (lane 6); imidazole-gradient elution fractions corresponding to the His-ROS1 protein peak (lanes 7-9); pooled fractions containing a single band (lane 10); dialyzed His-ROS1 protein used in enzymatic assays (lane 11).

## SUPPLEMENTARY FIGURE 2

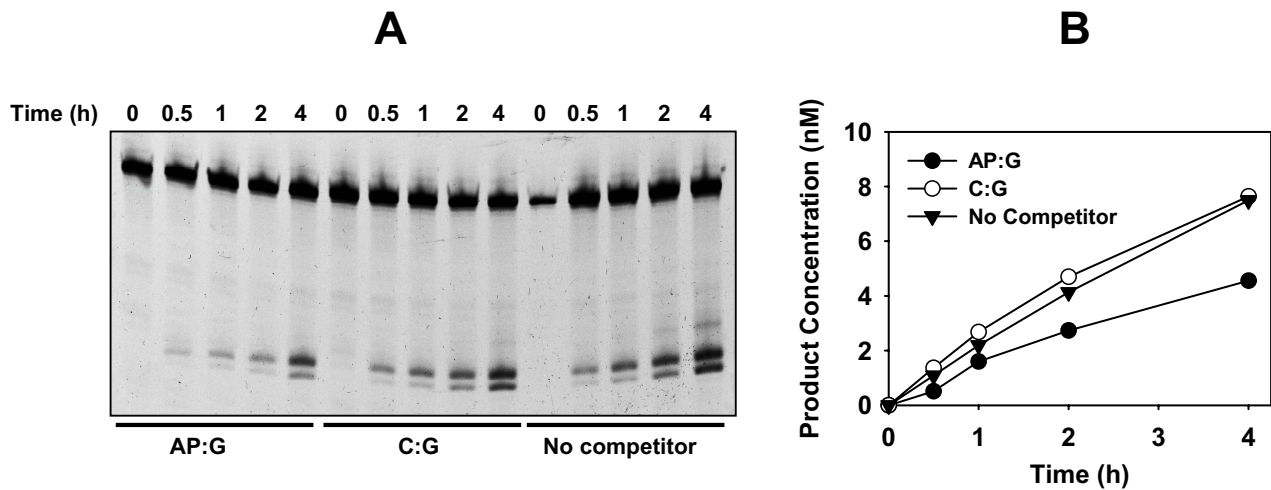

**Supplementary Figure 2. Effect of preincubation with DNA containing a reduced AP site on ROS1 activity.** Purified ROS1 (22.5 nM) was preincubated for 30 min with reaction buffer (filled triangles) or with 40 nM unlabelled duplex oligonucleotide containing either an AP:G (filled circles) or a C:G pair (open circles). Then, the fluorescein-labelled 5-meC:G substrate (40 nM) was added and the reactions were monitored for 4 h. Products were separated in a 12% denaturing polyacrylamide gel (A), and the relative amount of incised oligonucleotide was quantified by fluorescence scanning (B).

### SUPPLEMENTARY FIGURE 3

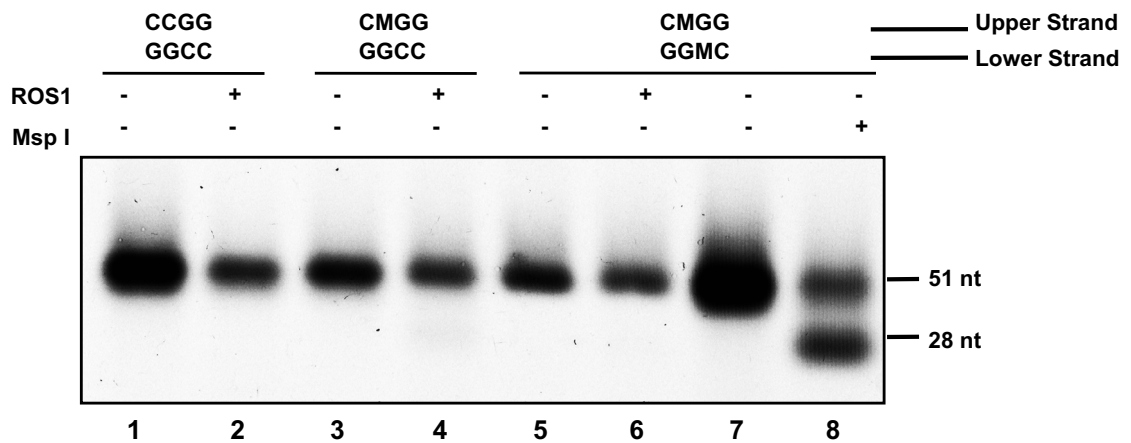

**Supplementary Figure 3. Analysis of double-strand break formation during ROS1 processing of hemimethylated and bimethylated DNA.** Purified ROS1 (22.5 nM) was incubated with 40 nM duplex DNA labelled on the upper strand that contained a single non-methylated (lanes 1 and 2), hemimethylated (lanes 2 and 3) or bimethylated (lanes 5, and 6) CG site. Reactions were stopped at the indicated times and products were separated in a 3% agarose gel. A control reaction was performed by digesting a bimethylated DNA substrate with MspI at 37°C for 20 min (lanes 7 and 8).

**Supplementary Table 1.** DNA sequence of oligonucleotides used as substrates.

| Name        | DNA sequence <sup>a</sup>                                                               | Strand | X =              |
|-------------|-----------------------------------------------------------------------------------------|--------|------------------|
| FL-CGF      | 5'-TCACGGGATCAATGTGTTCTTTCAGCT <b>CXGG</b> TCACGCTGACCAGGAATACC-3'                      | Upper  | C                |
| FL-meCGF    | 5'-TCACGGGATCAATGTGTTCTTTCAGCT <b>CXGG</b> TCACGCTGACCAGGAATACC-3'                      | Upper  | 5-meC            |
| FL-TGF      | 5'-TCACGGGATCAATGTGTTCTTTCAGCT <b>CXGG</b> TCACGCTGACCAGGAATACC-3'                      | Upper  | T                |
| FL-HUGF     | 5'-TCACGGGATCAATGTGTTCTTTCAGCT <b>CXGG</b> TCACGCTGACCAGGAATACC-3'                      | Upper  | 5-HU             |
| FL-HmeUGF   | 5'-TCACGGGATCAATGTGTTCTTTCAGCT <b>CXGG</b> TCACGCTGACCAGGAATACC-3'                      | Upper  | 5-HmeU           |
| FL-FUGF     | 5'-TCACGGGATCAATGTGTTCTTTCAGCT <b>CXGG</b> TCACGCTGACCAGGAATACC-3'                      | Upper  | 5-FU             |
| FL-BrUGF    | 5'-TCACGGGATCAATGTGTTCTTTCAGCT <b>CXGG</b> TCACGCTGACCAGGAATACC-3'                      | Upper  | 5-BrU            |
| FL-BrCGF    | 5'-TCACGGGATCAATGTGTTCTTTCAGCT <b>CXGG</b> TCACGCTGACCAGGAATACC-3'                      | Upper  | 5-BrC            |
| FL-APGF     | 5'-TCACGGGATCAATGTGTTCTTTCAGCT <b>CXGG</b> TCACGCTGACCAGGAATACC-3'                      | Upper  | THF <sup>b</sup> |
| CGR         | 3'-AGTGCCCTAGTTACACAAGAAAGTCGA <b>GGCC</b> AGTGCGACTGGTCCTTATGG-5'                      | Lower  | -                |
| meCGR       | 3'-AGTGCCCTAGTTACACAAGAAAGTCGA <b>GGXC</b> AGTGCGACTGGTCCTTATGG-5'                      | Lower  | 5-meC            |
| FL-CGR      | 3'-AGTGCCCTAGTTACACAAGAAAGTCGA <b>GGCC</b> AGTGCGACTGGTCCTTATGG-5'                      | Lower  | -                |
| FL-3GmeCGAF | 5'-AAGCTGCGATAAGCT <b>GXGA</b> TAAGCT <b>GXGA</b> TAAGCT <b>GXGA</b> TAAGCTGCGATAACT-3' | Upper  | 5-meC            |
| FL-3GUGAF   | 5'-AAGCTGCGATAAGCT <b>GXGA</b> TAAGCT <b>GXGA</b> TAAGCT <b>GXGA</b> TAAGCTGCGATAACT-3' | Upper  | U                |
| 3GCGAR      | 3'-AGTTATCGCAGCTTA <b>TCGC</b> AGCTTA <b>TCGC</b> AGCTTA <b>TCGC</b> AGCTTATCGCAGCTT-5' | Lower  | -                |

<sup>a</sup> Relevant regions are boxed.

<sup>b</sup> THF = tetrahydrofuran AP site analogue
